# Supplementary material
Source: MDPI journal article supplement (https://www.mdpi.com/2076-3417/14/7/3132)
Supplement: s1 [file s1]

## Sheet: DEF. 1801
First Author and reference	Year of publication	Country	Study type	Type of VR	Aims	Study design	Total sample (N), sex (m,f), age (range)	Task	Technology equipment (HW; SW)	VR scenario	Outcome measures	Information on VR session
McCleery 2020 [44]	2020	USA	quasi-experiment	HMD	To examine and assess safety, usability and feasibility of immersive VR training for ASD individuals interacting with police officers.	Single group design	60 ASD, 12-38 y	Answering different questions asked by virtual law enforcement officers.	HW: Head mounted Iphone, Ipad; SW: Commercial Software Floreo Police Safety Module	Real-world scenarios (city)	Police knowledge and experience questionnaire; Technology and VR experience questionnaire; SUS-ASD; Post-VR qualitative interview	Session's period: 6-week . Cycle A: 1 VR session 45 min Cycle B: 3 VR sessions 45 min
Fitzgerald 2018 [45]	2018	Australia	true experiment	HMD	To compare the effectiveness of video modelling and virtual reality for teaching adults with ASD.	Alternating treatments design.	2 male ASD; 25y and 31 y	Paper folding activities.	HW: Apple 13-inch MacbookPro, Oculus Rift; SW: Kolar and Adobe software.	Four full-sequence point of view videos depicting the construction of the paper folding projects.	Social validity interview; Fidelity checklists for each task; Task analysis scoring sheet.	Easy task (15 steps and 17 steps) = 5 minutes; intermediate task (27 steps and 24 steps) = 10 minutes;
Ip 2018 [46]	2018	China	true experiment	CAVE	To enhance emotional and social adaptation skills for ASD children.	Two-groups pre-post randomized experiment design	94 ASD; m=86, f=8; 6-12 y	Interaction with and observation of a virtual environment and observation of how their peers interacted with the scenario.	HW: four-side CAVE VR system; SW: MiddleVR for Unity3D.	6 scenarios focused on emotion control and relaxation strategies, simulation of various social situations, facilitation of consolidation and generalization.	Raven's Progressive Matrices; CAST; Faces Test; PEP-3; ABAS-II.	Session's period: 14-week. 2 session/week;
Parish-Morris 2018 [47]	2018	USA	quasi-experiment	HMD	To describe safety and feasibility of an immersive virtual reality application designed to teach essential skills to ASD adolescents and adults.	Single group	28 ASD; 12-37 y	Answering different questions asked by virtual law enforcement officers.	HW: Iphone, VR headset, Ipad; SW: Floreo PSM	Real world scenario (city) with a police officer.	SUS- ASD; Technology and VR experience questionnaire; Self-report questionnaire item about side effects; VR qualitative interview; Clinical observation of behaviors	One session: of 8 minutes with breaks every 2 minutes.
Amaral 2017 [48]	2017	Portugal	quasi-experiment	HMD	To ascertain the usability and feasibility of a novel BCI system with a paradigm that uses social joint attention cues.	Single group	13 TD; m=7, f=6; 21-26 y 4 male ASD; 15-22 y	Join attention cueing.	HW: Oculus Rift Development Kit 2 headset; SW: 3ds Max; SketchUp; 3D Warehouse; Mental Ray 3D rendering; Vizard Virtual Reality Toolkit;	Real-world scenarios (bedroom).	EEG	3 EEG recordings.
Greffou 2012 [49]	2011	Canada	true experiment	CAVE	To assess postural behavior in ASD in response to immersive visual environments.	Two groups	Group 1: 8 ASD and 11 TD; 12-15 y Group 2: 8 ASD and 23 TD; 16-33 y	Fixing a red dot located at the horizon and maintaining the balance	HW: CAVE system (FakespaceTM); Stereoscopic goggles; Magnetic motion sensor. SW: SGI ONYX 3200; Flock-of-Birds.	Virtual tunnel with an inner texture made of a checkerboard pattern, proposed in static and dynamic conditions.	Body Sway; Postural Perturbations.	Thirteen 68 s trials: 2 static tunnel trials, 9 dynamic tunnel trials; 2 eyes-closed trials.
Herrero 2020 [50]	2020	Spain	quasi-experiment	HMD	To design and validate a learning intervention to improve social and emotional competences for HFA students using VR.	Two groups	7 ASD; m=6, f=1; 8-15 y 7 TD	Social interaction with several avatars.	HW: Oculus Rift; Laptop PC; Sensor to track user's movements. SW: Unity 3D; iClone 7; Blender 2.79;	School's classroom and backyard garden	Ad HOC questionnaires; Interviews; Perfomance metrics	Setting classroom: 2-3 sessions for about 20 min/child; Setting garden: 7-8 sessions for about 20 min/child
Yeh 2020 [51]	2020	Taiwan	pre-experiment	HMD	To develop and test the efficacy of VR scenarios for social skills learning in ASD students.	Single group	10 ASD; students from grade 1 to 8	Social interaction with avatars representing classmates.	HW: Desktop computer; HTC VIVE; Controller; Headset microphone; SW: not specified	Four scenarios: Classroom, Exhibition, Restaurants, Park	Elementary and Junior High School students Social Skills Behavior Scale; Social skills effectiveness survey.	8 Sessions of 40 minutes, with 10 minutes of VR
Tarantino 2019 [52]	2019	Italy	quasi-experiment	HMD	To evaluate two-state-of-art HMDs in terms of acceptability, usability, and engagement capability.	Single group	6 ASD; m=6, f=0; 21-23 y	Interactive photorealistic and non-photorealistic scenarios, exploration of a historic sites and items.	HW: Oculus Rift; Holo Lens SW: not specified	Four scenarios: mix of interactive photorealistic and non-photorealistic scenarios;	Basic Empathy Scale (BES); Affective Empathy-Basic Empathy; AE-BES, Eyes Task; Advanced Theory of Mind (ToM) Task; Questionnaire on engagement factors Qualitative measure of engagement factors; Short interview; Concurrent Think Aloud (CTA) technique;	2 sessions for Oculus Rift and HoloLens, on separate days; 1 session = 20 minutes
Mul 2019 [53]	2019	United Kingdom	quasi-experiment	HMD	To test VR as a tool to assess wheather bodily self-consciousness in ASD is altered as a result of multisensory processing differences.	Two groups	22 ASD; m=14, m=8; 29 TD; m=16, f=13; overall age range 18–53	Audiotactile integration task for peripersonal space;	HW: Oculus Rift CV1 VR; SW: Unity.	The body of the participant is displayed from the back in four conditions (body synchronous, body asynchronous, object synchronous and object asynchronous.)	Autism Quotient; Toronto Alexithymia Scale; Affective and Cognitive Empathy; Multidimensional Assessment of Interoceptive Awareness (MAIA);	In the body conditions, two minutes of strokes with a stick. In the object conditions, two minutes of strokes using two sticks.
Biffi 2018 [54]	2018	Italy	quasi-experiment	SI-VR	To describe gait pattern and motor performance during discrete perturbation of children with ASD compared to TD peers.	Two groups	15 ASD; m=14, f=1; mean age 9.8 y 16 TD; m=15, f=1; mean age 10.0 y	Walking task with perturbations	HW: GRAIL (Gait Real-time Analysis Interactive Lab, Motek Medical); Vicon motion tracking system. SW: customized software developed in MATLAB	Urban scenario	Multi-sensor platform (spatio-temporal, kinetics and kinematics data).	6 min of walking, 20 trials for each participant;
Bozgeyikli 2017 [55]	2017	USA	quasi-experiment	HMD	To explore the effectiveness of a virtual reality system in training individuals with ASD on six vocational transferrable job skills.	Two groups	9 ASD; mean age 25.4 y 9 TD; mean age 29.0 y	Vocational training on transferrable job skills.	HW: VR2200 Head Mounted Display; Hand and foot bands with optical markers; Large 180° curved curtain screen SW: Unity	Real workplace scenario (warehouse, parking lot, outside street, grocery store, office)	Custom scoring algorithm; Follow-up survey; Survey on Tiredness, Immersion, Motion sickness, Satisfaction, Effective Training, Accuracy, Reasonable Design; Follow-up questionnaire and Interview.	1 session = 4 hours (TD) 2 session of 2 hours for ASD
Ip 2016 [56]	2016	Japan	pre-experiment	SI-VR	VR-enabled system to facilitate social adaptation training for school-aged children with clinical or suspected diagnosis of ASD.	Single group	Pilot study: 20 ASD; 6-9 y Experimental study: 33 ASD; 6 - 11 y	Six VR training scenarios.	HW: CAVE; wireless Xbox 360 game controller. SW: not specified.	Six real world learning scenarios.	Raven progressive Matrices Test; CAST; Faces Test; Eyes test; Psychoeducational Profile (PEP-3), Spence Children’s Anxiety Scale (SCAS-C), Faux Pas Test and Social Attribution Task). Spence Children’s Anxiety Scale (SCAS-P), Children’s Communication Checklist (CCC-2), and Adaptive Behavior Assessment System (ABAS-II).	28 one-hour through 14 weeks.
Cheng 2014 [57]	2014	Taiwan	pre-experiment	HMD	To investigate the performance of data gloves and stereoscopic projection in assisting the impairment of social etiquettes for children with ASD.	Single-subject, multiple-probe design across subjects + follow up	3 ASD; m=3, f=0; 9 - 11 y	Interaction with virtual objects and characteristics immersed in a virtual environment.	HW: 3D-glasses; 5DT Data Glove 5; 120-inch 3D stereoscopic screen by the dual stereoscopic projector. SW: 3Ds Max; Virtools.	Real world scenario (3D virtual amusement park)	Social etiquettes checklist (SEC)	40-50min each session.
Cheng 2015 [58]	2015	Taiwan	pre-experiment	HMD	To determine the effectiveness of a 3D system in promoting the comprehension of social protocols in individuals with ASD.	Single-subject combined with a multipleprobe across-subjects design	3 ASD; m=3, f=0; 12 - 13 y	Twenty-four problem-based social questions developed for use with the VR system.	HW: I-Glasses PC 3D Pro; laptop. SW: 3DMax and Poser software;	Animated social events.	Social event card; social behavior scale. Behavioral measures	Five sessions, for approximately 30 to 40 min each.
Jarrold 2013 [59]	2013	USA	quasi-experiment	HMD	To simulate public speaking task in VR to study social attention and its association with classroom learning in students with HFA.	Mixed model	37 ASD; 8-16 y 54 TD; 8-16 y	VR public speaking paradigm with cued and non-cued conditions.	HW: eMagin Z800 3DVisor; two 1.8-inch monitors; InterSense Inertia Cube 2-US/JP sensor. SW: WORLD VIZVizard software	3D virtual classroom with seven virtual students.	Measure of orienting, measure of fixation length, total number of words used.	2,5 h session duration, 90 sec warm-up baseline period, 180 sec test conditions
Trepagnier 2002 [60]	2002	USA	quasi-experiment	HMD	To clarify the character of face gaze in ASD.	Two groups	5 ASD; m=4, f=1; mean age 18.4 y 6 TD; m=4, f=2;mean age 19.5 y	Series of images of faces and objects presented stereoscopically in VR.	HW: HMD equipped with an ISCAN eye-tracking system; SW: not specified	Images of faces and objects presented stereoscopically in VR.	Recognition accuracy; videotaped recording; percent of fixations on central face region.	Four blocks of trials were presented sequentially.
Cook 2014 [61]	2014	United Kingdom	quasi-experiment	CAVE	To investigate the biological specificity of interference effects of action observation in ASD using VR.	Mixed model	10 ASD; m=8, f=2; mean age 14.74 12 TD; m=10, f=2; mean age 15.79	Interaction with a virtual reality agent with either human or robot form.	HW: CAVE, small head-traking device; stereo shutter glasses; markers; Vicon motion tracking systems. SW: not specified	Virtual human agent and virtual robot agent.	Data acquired from markers.	10 experimental conditions for 1 h duration.
Amaral 2018 [62]	2018	Canada	quasi-experiment	Canada	To test usability and feasibility of 3 EEG setups combined with a VR headset as part of a novel system with a paradigm that uses social joint attention cues in ASD participants.	Single group	15 ASD; m=15, f=0; 16-38 y	Joint-attention assessment task with avatars gazing or pointing cues.	HW: Oculus Rift DK2 headset; eye tracking (embedded in the Oculus Rifft) SW: BCI (Brain Computer Interface) training paradigm	4 virtual scenarios: cafè. classroom, kiosk, zebra crossing.	Eye-tracking metrics; Autism Treatment Evaluation Checklist (ATEC); Vineland Adaptive Behavior Scales (VABS), neuropsychological measures; EEG.	Seven BCI sessions spread over 4 months.
Newbutt 2016 [63]	2016	USA	quasi-experimental	HMD	To investigate willingness to use and acceptability of VR-HMDs among people with ASD.	Single group + follow up	Phase 1: 29 ASD; m=22, f=7; 17 - 53 y Phase 2: 11 ASD; m=10, f=1; 19 - 43 y	Series of 3D immersive experiences in VR.	HW: Oclus Rift; headphones; Xbox 360° controller; laptop computer SW: commercially available VR scenarios	Virtual cinema, cafè, a safari, Apollo 11 mission and a Tuscan house virtual scenario.	ITC-SOPI questionnaire; behavioral observation.	Phase I: 10 min for three VR scenarios. Phase II: two session of VR (25 minutes each).
Bozgeyikli 2018 [64]	2018	USA	quasi-experiment	SI-VR	To examinate the effects of various attributes of user interfaces designed for VR	Single group	15 ASD; m=11, f=4; mean age = 22.73 y 15 TD; m=10, f=5; mean age = 25.80 y	Tasks involving sorting, fetching, and alignment of boxes on two workstations, moving boxes on two conveyor belts, and a vocational task of finding boxes.	HW: VR2200 (HMD); motion tracking system; Hand bands with markers; SW: Unity	Virtual warehouse	Survey about experience (user experience, presence, motion sickness, and user comments)	Three 25 minutes VR sessions.
Lorenzo 2013 [65]	2012	Spain	quasi-experiment	SI-VR	To determine the possible inclusion of immersive virtual reality as a support tool and learning strategy in ASD.	Single group	20 ASD; m=16, f=4; 8 - 15 y	Executive functions in school learning and social competence.	HW: two screens; CristalEyes Stereography glasses; speakers and amplifiers SW: Vizard.; 3Dmax	School playground with avatars and a bedroom.	Supportive tasks protocol (TEVISA); Interviews with school teachers; Instructional protocol of avatars (PIAV);	80 individual sessions, 2 per week, 25 min each.
Lorenzo 2016 [66]	2016	Spain	true experiment	SI-VR	To evaluate immersive VR to improve and train the emotional skills of students with ASD.	Single group	20 ASD; m=14, f=6; 7 - 12 y 20 TD; m=15, f=5; 7 - 12 y	The immersive environments allowing students to train and develop social skills in a structured, visual and continuous manner.	HW: Semi cave; 7 DoF Mitsubishi PA-10; SW: Vizard; Peoplemaker; 3ds Max.	10 social scenarios in which students use the emotional behaviors of joy, sadness, anger, fear, surprise.	Computer vision metrics; interviews with students’ tutoring teachers; Questionnaires for measuring the student’s development.	4 sessions per month, 12 months, 35 min each.
